# Supplementary material for: From Byproduct to Resource: Fermented Apple Pomace as Beer Flavoring
Source: PubMed Central journal article supplement (PMC6723389; doi:10.3390/foods8080309), 2019-08-01
Supplement: foods-08-00309-s001.pdf [file foods-08-00309-s001.pdf]

## Supplementary material

**Table S1.** Influence of LAB strain fermentation on the volatile profile of apple pomace.

| Compounds                                                | Unstarted |      |   | F1473 |      |    | F1019 |      |    | F2246 |      |   |
|----------------------------------------------------------|-----------|------|---|-------|------|----|-------|------|----|-------|------|---|
|                                                          | ppm       | ±SD  |   | ppm   | ±SD  |    | ppm   | ±SD  |    | ppm   | ±SD  |   |
| <b>Ketones</b>                                           | 0.226     | 0.05 | b | 2.258 | 0.41 | a  | 0.162 | 0.03 | b  | 0.138 | 0.02 | b |
| 2-Heptanone                                              | 0.001     | 0.00 | b | 0.051 | 0.00 | a  | 0.002 | 0.00 | b  | 0.003 | 0.00 | b |
| Ethyl isoamyl ketone                                     | 0.000     | 0.00 | b | 0.200 | 0.00 | a  | 0.000 | 0.00 | b  | 0.000 | 0.00 | b |
| Sulcatone                                                | 0.226     | 0.05 | b | 2.188 | 0.41 | a  | 0.160 | 0.03 | b  | 0.136 | 0.02 | b |
| <b>Alehydes</b>                                          | 1.030     | 0.23 | b | 3.396 | 0.21 | a  | 0.597 | 0.06 | b  | 0.207 | 0.02 | b |
| 2,4-decadienal/2-Phenylethylacetate                      | 0.002     | 0.00 |   | 0.017 | 0.01 |    | 0.000 | 0.00 |    | 0.001 | 0.00 |   |
| 2-Decenal                                                | 0.006     | 0.00 | a | 0.001 | 0.00 | b  | 0.000 | 0.00 | b  | 0.000 | 0.00 | b |
| 2-Heptenal                                               | 0.032     | 0.01 | a | 0.014 | 0.00 | ab | 0.018 | 0.01 | ab | 0.002 | 0.00 | b |
| 2-Hexenal                                                | 0.235     | 0.07 | a | 0.058 | 0.00 | b  | 0.083 | 0.01 | b  | 0.000 | 0.00 | b |
| Benzaldehyde                                             | 0.609     | 0.15 | b | 3.278 | 0.19 | a  | 0.407 | 0.08 | b  | 0.132 | 0.00 |   |
| Furfural                                                 | 0.016     | 0.00 | b | 0.025 | 0.00 | b  | 0.085 | 0.01 | a  | 0.035 | 0.01 |   |
| Hexanal                                                  | 0.081     | 0.01 | a | 0.001 | 0.00 | bc | 0.001 | 0.00 | c  | 0.034 | 0.01 | b |
| Heptanal                                                 | 0.005     | 0.00 |   | 0.000 | 0.00 |    | 0.000 | 0.00 |    | 0.000 | 0.00 |   |
| Nonanal                                                  | 0.037     | 0.01 | a | 0.003 | 0.00 | b  | 0.000 | 0.00 | b  | 0.000 | 0.00 | b |
| Octanal                                                  | 0.007     | 0.00 | a | 0.002 | 0.00 | b  | 0.002 | 0.00 | b  | 0.002 | 0.00 | b |
| <b>Alcohols</b>                                          | 0.393     | 0.01 | b | 9.363 | 0.32 | a  | 0.389 | 0.01 | b  | 0.362 | 0.01 | b |
| 1-Octen-3-ol                                             | 0.005     | 0.01 | b | 0.087 | 0.00 | a  | 0.015 | 0.00 | b  | 0.016 | 0.00 | b |
| 2-ethyl-1-hexanol                                        | 0.004     | 0.00 |   | 0.017 | 0.01 |    | 0.000 | 0.00 |    | 0.000 | 0.00 |   |
| 2-Hexenol                                                | 0.025     | 0.01 | b | 0.802 | 0.02 | a  | 0.000 | 0.00 | b  | 0.000 | 0.00 | b |
| Benzyl alcohol                                           | 0.005     | 0.00 | b | 0.343 | 0.03 | a  | 0.028 | 0.00 | b  | 0.045 | 0.00 | b |
| Butanol                                                  | 0.008     | 0.00 | b | 0.052 | 0.00 | a  | 0.016 | 0.00 | b  | 0.013 | 0.00 | b |
| Hexanol                                                  | 0.318     | 0.01 | b | 7.906 | 0.31 | a  | 0.307 | 0.00 | b  | 0.246 | 0.01 | b |
| Isoamyl alcohol                                          | 0.000     | 0.00 |   | 0.000 | 0.00 |    | 0.000 | 0.00 |    | 0.000 | 0.00 |   |
| Octanol                                                  | 0.008     | 0.00 | b | 0.074 | 0.00 | a  | 0.014 | 0.00 | b  | 0.011 | 0.00 | b |
| Pentanol                                                 | 0.007     | 0.00 | b | 0.081 | 0.00 | a  | 0.008 | 0.00 | b  | 0.015 | 0.00 | b |
| Phenylethyl alcohol                                      | 0.013     | 0.00 | a | 0.001 | 0.00 | b  | 0.001 | 0.00 | b  | 0.015 | 0.01 | a |
| <b>Terpenes, terpene derivatives and nor-isoprenoids</b> | 0.540     | 0.11 | b | 2.506 | 0.08 | a  | 0.632 | 0.12 | b  | 0.521 | 0.12 | b |
| D-Limonene                                               | 0.002     | 0.00 | b | 0.013 | 0.00 | a  | 0.001 | 0.00 | b  | 0.000 | 0.00 | b |
| cis-Geraniol                                             | 0.005     | 0.00 | b | 0.000 | 0.00 | c  | 0.006 | 0.00 | a  | 0.004 | 0.00 | b |
| Estragole                                                | 0.005     | 0.00 |   | 0.008 | 0.00 |    | 0.005 | 0.00 |    | 0.005 | 0.00 |   |
| Eugenol                                                  | 0.002     | 0.10 | b | 0.013 | 0.07 | a  | 0.004 | 0.10 | b  | 0.002 | 0.11 | b |

|                            |              |             |          |               |             |          |              |             |          |              |             |          |
|----------------------------|--------------|-------------|----------|---------------|-------------|----------|--------------|-------------|----------|--------------|-------------|----------|
| Geranyl acetone            | 0.000        | 0.00        | b        | 0.000         | 0.01        | b        | 0.003        | 0.01        | a        | 0.003        | 0.01        | a        |
| Linalool                   | 0.008        | 0.00        | b        | 0.030         | 0.00        | a        | 0.011        | 0.00        | b        | 0.011        | 0.00        | b        |
| $\alpha$ -Farnesene (E, E) | 0.498        | 0.00        | b        | 2.323         | 0.00        | a        | 0.553        | 0.00        | b        | 0.455        | 0.00        | b        |
| $\alpha$ -Farnesene (Z, E) | 0.012        | 0.00        | b        | 0.093         | 0.00        | a        | 0.049        | 0.00        | b        | 0.034        | 0.00        | b        |
| $\beta$ -Damascenone       | 0.009        | 0.00        | b        | 0.026         | 0.00        | a        | 0.000        | 0.00        | c        | 0.008        | 0.00        | b        |
| <b>Esters</b>              | <b>0.455</b> | <b>0.02</b> | <b>b</b> | <b>2.712</b>  | <b>0.47</b> | <b>a</b> | <b>0.210</b> | <b>0.03</b> | <b>b</b> | <b>0.251</b> | <b>0.07</b> | <b>b</b> |
| Butyl 2-methylbutanoate    | 0.011        | 0.00        | b        | 0.183         | 0.04        | a        | 0.000        | 0.00        | b        | 0.000        | 0.00        | b        |
| Butyl caproate             | 0.038        | 0.01        | b        | 0.200         | 0.07        | a        | 0.049        | 0.01        | b        | 0.055        | 0.06        | b        |
| Capric acid, ethyl ester   | 0.000        | 0.00        |          | 0.000         | 0.00        |          | 0.000        | 0.00        |          | 0.000        | 0.00        |          |
| Ethyl-9-decenoate          | 0.000        | 0.00        |          | 0.000         | 0.00        |          | 0.000        | 0.00        |          | 0.000        | 0.00        |          |
| Hexyl acetate              | 0.122        | 0.01        | a        | 0.162         | 0.04        | a        | 0.000        | 0.00        | b        | 0.000        | 0.00        | b        |
| Hexyl butyrate             | 0.026        | 0.00        | b        | 0.001         | 0.00        | b        | 0.123        | 0.03        | a        | 0.050        | 0.01        | b        |
| Hexyl caproate             | 0.135        | 0.02        | b        | 0.634         | 0.03        | a        | 0.037        | 0.00        | c        | 0.147        | 0.00        | b        |
| Hexyl n-valerate           | 0.117        | 0.00        | b        | 1.498         | 0.46        | a        | 0.000        | 0.00        | c        | 0.000        | 0.00        | c        |
| Isoamyl acetate            | 0.000        | 0.00        |          | 0.000         | 0.00        |          | 0.000        | 0.00        |          | 0.000        | 0.00        |          |
| Isoamyl caproate           | 0.007        | 0.00        | b        | 0.034         | 0.00        | a        | 0.000        | 0.00        | b        | 0.000        | 0.00        | b        |
| <b>TOTAL</b>               | <b>2.654</b> | <b>0.42</b> | <b>b</b> | <b>20.235</b> | <b>1.48</b> | <b>a</b> | <b>1.998</b> | <b>0.12</b> | <b>b</b> | <b>1.483</b> | <b>0.08</b> | <b>b</b> |

One-way analysis of variance (ANOVA), followed by Tukey's test;  $p \leq 0.05$ . Per each row, values followed by different letters are statistically different.

**Table S2. INFLUENCE OF HEATING TREATMENT AND FERMENTATION WITH *LACTOBACILLUS RHAMNOSUS* 1473 ON THE VOLATILE PROFILE OF APPLE POMACE.**

| Compounds                             | Unstarted |          |        |          | F1473 |          |       |          | Statistical analysis |       |       |
|---------------------------------------|-----------|----------|--------|----------|-------|----------|-------|----------|----------------------|-------|-------|
|                                       | NHT       |          | HT     |          | NHT   |          | HT    |          | F                    | HT    | F*HT  |
|                                       | (ppm)     | $\pm$ SD | (ppm)  | $\pm$ SD | (ppm) | $\pm$ SD | (ppm) | $\pm$ SD | p                    |       |       |
| <b>Ketones</b>                        | 0.226     | 0.05     | 0.792  | 0.02     | 2.258 | 0.41     | 1.743 | 0.27     | 0.001                | 0.892 | 0.037 |
| 2-Heptanone                           | 0.000     | 0.00     | 0.000  | 0.00     | 0.051 | 0.00     | 0.053 | 0.00     | 0.000                | 0.563 | 0.581 |
| Ethyl isoamyl ketone                  | 0.000     | 0.00     | 0.000  | 0.00     | 0.020 | 0.00     | 0.004 | 0.00     | 0.000                | 0.001 | 0.001 |
| Sulcatone                             | 0.226     | 0.05     | 0.792  | 0.02     | 2.188 | 0.41     | 1.686 | 0.27     | 0.001                | 0.864 | 0.038 |
| <b>Aldehydes</b>                      | 1.994     | 0.18     | 12.929 | 0.01     | 3.396 | 0.21     | 5.412 | 0.18     | 0.000                | 0.000 | 0.000 |
| Hexanal                               | 0.339     | 0.06     | 1.778  | 0.33     | 0.001 | 0.00     | 0.001 | 0.00     | 0.001                | 0.004 | 0.004 |
| 2,4- Decadienal/2-phenylethyl acetate | 0.005     | 0.00     | 0.038  | 0.00     | 0.017 | 0.00     | 0.005 | 0.01     | 0.000                | 0.008 | 0.051 |
| 2-Decenal                             | 0.006     | 0.00     | 0.016  | 0.01     | 0.001 | 0.01     | 0.009 | 0.00     | 0.008                | 0.002 | 0.508 |

|                                                          |              |             |              |             |              |             |              |             |              |              |              |
|----------------------------------------------------------|--------------|-------------|--------------|-------------|--------------|-------------|--------------|-------------|--------------|--------------|--------------|
| 2-Heptenal                                               | 0.011        | 0.00        | 0.032        | 0.00        | 0.014        | 0.00        | 0.067        | 0.01        | 0.001        | 0.000        | 0.001        |
| 2-Hexenal                                                | 0.235        | 0.07        | 1.236        | 0.23        | 0.058        | 0.00        | 0.166        | 0.04        | 0.002        | 0.003        | 0.007        |
| Benzaldehyde                                             | 1.337        | 0.00        | 9.602        | 0.00        | 3.278        | 0.00        | 5.102        | 0.00        | 0.000        | 0.000        | 0.000        |
| Furfural                                                 | 0.016        | 0.05        | 0.050        | 0.10        | 0.025        | 0.19        | 0.029        | 0.23        | 0.125        | 0.005        | 0.012        |
| Heptanal                                                 | 0.005        | 0.00        | 0.035        | 0.00        | 0.000        | 0.00        | 0.002        | 0.00        | 0.000        | 0.000        | 0.000        |
| Nonanal                                                  | 0.035        | 0.00        | 0.119        | 0.01        | 0.003        | 0.00        | 0.028        | 0.01        | 0.001        | 0.001        | 0.009        |
| Octanal                                                  | 0.005        | 0.00        | 0.023        | 0.00        | 0.000        | 0.00        | 0.005        | 0.00        | 0.001        | 0.001        | 0.007        |
| <b>Alcohols</b>                                          | <b>0.986</b> | <b>0.07</b> | <b>3.990</b> | <b>0.29</b> | <b>9.363</b> | <b>0.32</b> | <b>9.676</b> | <b>0.56</b> | <b>0.000</b> | <b>0.005</b> | <b>0.006</b> |
| 1-Octen-3-ol                                             | 0.003        | 0.00        | 0.029        | 0.01        | 0.087        | 0.00        | 0.045        | 0.00        | 0.000        | 0.022        | 0.000        |
| 2-Ethyl-1-hexanol                                        | 0.004        | 0.00        | 0.023        | 0.01        | 0.017        | 0.01        | 0.025        | 0.01        | 0.142        | 0.032        | 0.278        |
| 2-Hexenol                                                | 0.090        | 0.00        | 0.021        | 0.00        | 0.802        | 0.02        | 0.610        | 0.01        | 0.000        | 0.000        | 0.002        |
| Benzyl alcohol                                           | 0.007        | 0.00        | 0.013        | 0.00        | 0.343        | 0.03        | 0.030        | 0.00        | 0.000        | 0.000        | 0.000        |
| Butanol                                                  | 0.004        | 0.00        | 0.011        | 0.00        | 0.052        | 0.00        | 0.040        | 0.00        | 0.000        | 0.168        | 0.005        |
| Hexanol                                                  | 0.862        | 0.06        | 3.828        | 0.27        | 7.906        | 0.31        | 8.186        | 0.58        | 0.000        | 0.003        | 0.006        |
| Isoamyl alcohol                                          | 0.000        | 0.00        | 0.000        | 0.00        | 0.000        | 0.00        | 0.000        | 0.00        | 0.000        | 0.000        | 0.001        |
| Octanol                                                  | 0.009        | 0.00        | 0.039        | 0.00        | 0.074        | 0.00        | 0.069        | 0.00        | 0.000        | 0.001        | 0.000        |
| Pentanol                                                 | 0.006        | 0.00        | 0.023        | 0.00        | 0.081        | 0.00        | 0.049        | 0.00        | 0.000        | 0.018        | 0.000        |
| Phenylethyl alcohol                                      | 0.001        | 0.00        | 0.004        | 0.00        | 0.001        | 0.00        | 0.621        | 0.02        | 0.000        | 0.000        | 0.000        |
| <b>Terpenes, terpene derivatives and nor-isoprenoids</b> | <b>0.194</b> | <b>0.30</b> | <b>0.020</b> | <b>0.01</b> | <b>2.506</b> | <b>0.08</b> | <b>2.756</b> | <b>1.02</b> | <b>0.022</b> | <b>0.037</b> | <b>0.075</b> |
| D-Limonene                                               | 0.002        | 0.00        | 0.000        | 0.00        | 0.013        | 0.00        | 0.017        | 0.00        | 0.001        | 0.545        | 0.114        |
| Estragole                                                | 0.003        | 0.00        | 0.009        | 0.00        | 0.008        | 0.00        | 0.010        | 0.00        | 0.073        | 0.014        | 0.123        |
| Eugenol                                                  | 0.001        | 0.00        | 0.003        | 0.00        | 0.013        | 0.00        | 0.018        | 0.00        | 0.000        | 0.025        | 0.243        |
| Geraniol                                                 | 0.000        | 0.00        | 0.000        | 0.00        | 0.000        | 0.00        | 0.000        | 0.00        | 0.526        | 0.286        | 0.311        |
| Geranyl acetone                                          | 0.000        | 0.00        | 0.000        | 0.00        | 0.000        | 0.00        | 0.000        | 0.00        | 0.001        | 0.002        | 0.019        |
| Linalool                                                 | 0.003        | 0.00        | 0.015        | 0.00        | 0.030        | 0.00        | 0.030        | 0.00        | 0.001        | 0.048        | 0.037        |
| $\alpha$ -farnesene                                      | 0.315        | 0.00        | 2.206        | 0.02        | 2.323        | 0.07        | 2.588        | 1.01        | 0.029        | 0.039        | 0.086        |
| $\alpha$ -farnesene (Z,E)                                | 0.012        | 0.00        | 0.071        | 0.00        | 0.093        | 0.01        | 0.077        | 0.00        | 0.000        | 0.001        | 0.000        |
| $\beta$ -Damascenone                                     | 0.001        | 0.00        | 0.008        | 0.00        | 0.026        | 0.00        | 0.017        | 0.00        | 0.000        | 0.326        | 0.002        |
| <b>Esters</b>                                            | <b>0.370</b> | <b>0.02</b> | <b>1.019</b> | <b>0.07</b> | <b>2.712</b> | <b>0.47</b> | <b>1.600</b> | <b>0.04</b> | <b>0.000</b> | <b>0.188</b> | <b>0.003</b> |
| Butyl 2-methylbutanoate                                  | 0.011        | 0.00        | 0.000        | 0.00        | 0.183        | 0.04        | 0.092        | 0.01        | 0.001        | 0.017        | 0.037        |
| Butyl caproate                                           | 0.025        | 0.00        | 0.072        | 0.00        | 0.200        | 0.07        | 0.098        | 0.00        | 0.013        | 0.311        | 0.034        |
| Capric acid, ethyl ester                                 | 0.000        | 0.00        | 0.000        | 0.00        | 0.000        | 0.00        | 0.000        | 0.00        | 0.000        | 0.000        | 0.001        |
| Ethyl 9-decenoate                                        | 0.000        | 0.00        | 0.000        | 0.00        | 0.000        | 0.00        | 0.000        | 0.00        | 0.001        | 0.004        | 0.010        |
| Hexyl acetate                                            | 0.122        | 0.01        | 0.138        | 0.02        | 0.162        | 0.04        | 0.168        | 0.03        | 0.161        | 0.611        | 0.812        |
| Hexyl butyrate                                           | 0.000        | 0.00        | 0.000        | 0.00        | 0.001        | 0.00        | 0.001        | 0.00        | 0.000        | 0.422        | 0.002        |
| Hexyl caproate                                           | 0.088        | 0.01        | 0.240        | 0.07        | 0.634        | 0.03        | 0.494        | 0.00        | 0.000        | 0.826        | 0.004        |
| Hexyl n-valerate                                         | 0.117        | 0.00        | 0.523        | 0.02        | 1.498        | 0.46        | 0.721        | 0.00        | 0.008        | 0.314        | 0.021        |
| Isoamyl acetate                                          | 0.000        | 0.00        | 0.000        | 0.00        | 0.000        | 0.00        | 0.000        | 0.00        | 0.000        | 0.000        | 0.000        |

|                  |       |      |        |      |        |      |        |      |       |       |       |
|------------------|-------|------|--------|------|--------|------|--------|------|-------|-------|-------|
| Isoamyl caproate | 0.007 | 0.00 | 0.046  | 0.00 | 0.034  | 0.00 | 0.025  | 0.00 | 0.085 | 0.000 | 0.000 |
| <b>TOTAL</b>     | 4.079 | 0.14 | 21.649 | 0.45 | 22.005 | 1.55 | 22.419 | 1.62 | 0.000 | 0.000 | 0.000 |

Two-way analysis of variance (ANOVA) ( $p \leq 0.05$ ). NHT: not heated apple pomace. HT: heated apple pomace. F: fermentation with *Lactobacillus rhamnosus* 1473.

Table S3: Influence of time of maturation and of the addition of apple pomace, fermented with *Lactobacillus rhamnosus* 1473, on the volatile profile of beer.

| Compounds                            | T0                |      |                  |      |              |      | T30              |      |                  |      |              |      | Statistical analysis |       |       |
|--------------------------------------|-------------------|------|------------------|------|--------------|------|------------------|------|------------------|------|--------------|------|----------------------|-------|-------|
|                                      | Beer CON TR (ppm) |      | Beer UNS T (ppm) |      | Beer F (ppm) |      | Beer CONTR (ppm) |      | Beer UNS T (ppm) |      | Beer F (ppm) |      | T                    | F     | T*F   |
|                                      | ±SD               | ±SD  | ±SD              | ±SD  | ±SD          | ±SD  | ±SD              | ±SD  | ±SD              | ±SD  | ±SD          | ±SD  | p                    |       |       |
| <b>Ketones</b>                       | 0,247             | 0,06 | 0,273            | 0,06 | 0,377        | 0,07 | 0,003            | 0,00 | 0,030            | 0,00 | 0,074        | 0,01 | 0,000                | 0,047 | 0,589 |
| 2-Nonanone                           | 0,000             | 0,00 | 0,009            | 0,00 | 0,032        | 0,00 | 0,001            | 0,00 | 0,004            | 0,00 | 0,011        | 0,00 | 0,001                | 0,000 | 0,001 |
| Sulcatone                            | 0,247             | 0,06 | 0,264            | 0,06 | 0,344        | 0,07 | 0,002            | 0,00 | 0,026            | 0,00 | 0,063        | 0,01 | 0,000                | 0,095 | 0,754 |
| <b>Aldehydes</b>                     | 0,993             | 0,15 | 1,076            | 0,20 | 1,127        | 0,21 | 0,216            | 0,01 | 0,100            | 0,01 | 0,248        | 0,02 | 0,000                | 0,561 | 0,600 |
| 2,4-decadienal/2-phenylethyl acetate | 0,926             | 0,12 | 0,787            | 0,16 | 0,787        | 0,14 | 0,093            | 0,00 | 0,054            | 0,00 | 0,095        | 0,01 | 0,000                | 0,459 | 0,615 |
| 2-Heptenal                           | 0,000             | 0,00 | 0,014            | 0,00 | 0,015        | 0,00 | 0,001            | 0,00 | 0,000            | 0,00 | 0,000        | 0,00 | 0,000                | 0,004 | 0,002 |
| Benzaldehyde                         | 0,000             | 0,00 | 0,113            | 0,03 | 0,046        | 0,01 | 0,004            | 0,00 | 0,005            | 0,00 | 0,004        | 0,00 | 0,001                | 0,002 | 0,002 |
| Decanal                              | 0,000             | 0,00 | 0,041            | 0,00 | 0,056        | 0,02 | 0,021            | 0,01 | 0,005            | 0,00 | 0,015        | 0,00 | 0,014                | 0,026 | 0,007 |
| Furfural                             | 0,000             | 0,00 | 0,024            | 0,00 | 0,089        | 0,01 | 0,003            | 0,00 | 0,002            | 0,00 | 0,013        | 0,01 | 0,000                | 0,000 | 0,000 |
| Hexanal                              | 0,000             | 0,00 | 0,000            | 0,00 | 0,004        | 0,00 | 0,001            | 0,00 | 0,002            | 0,00 | 0,003        | 0,00 | 0,831                | 0,002 | 0,052 |
| Nonanal                              | 0,066             | 0,02 | 0,049            | 0,01 | 0,078        | 0,02 | 0,083            | 0,02 | 0,029            | 0,01 | 0,105        | 0,00 | 0,446                | 0,014 | 0,220 |
| Phenylacetaldehyde                   | 0,000             | 0,00 | 0,049            | 0,00 | 0,052        | 0,01 | 0,011            | 0,00 | 0,003            | 0,00 | 0,014        | 0,00 | 0,000                | 0,000 | 0,000 |

|                                                          |        |      |        |      |        |      |       |      |       |      |       |      |       |       |       |
|----------------------------------------------------------|--------|------|--------|------|--------|------|-------|------|-------|------|-------|------|-------|-------|-------|
| <b>Alcohols</b>                                          | 24,940 | 1,34 | 25,371 | 5,24 | 25,811 | 3,55 | 2,957 | 0,14 | 2,056 | 0,11 | 3,921 | 0,39 | 0,000 | 0,815 | 0,914 |
| 1-Octen-3-ol                                             | 0,037  | 0,00 | 0,038  | 0,01 | 0,059  | 0,02 | 0,006 | 0,00 | 0,004 | 0,00 | 0,005 | 0,00 | 0,021 | 0,033 | 0,019 |
| 2-Ethyl-1-hexanol                                        | 0,000  | 0,00 | 0,047  | 0,01 | 0,320  | 0,07 | 0,000 | 0,00 | 0,006 | 0,00 | 0,056 | 0,01 | 0,000 | 0,009 | 0,039 |
| 2-Decanol                                                | 0,226  | 0,01 | 0,104  | 0,01 | 0,093  | 0,01 | 0,032 | 0,00 | 0,010 | 0,00 | 0,019 | 0,00 | 0,000 | 0,000 | 0,000 |
| 2-Hexenol                                                | 0,000  | 0,00 | 0,001  | 0,00 | 0,006  | 0,00 | 0,001 | 0,00 | 0,000 | 0,00 | 0,000 | 0,00 | 0,021 | 0,033 | 0,019 |
| 2-Nonanol                                                | 0,456  | 0,01 | 0,320  | 0,05 | 0,297  | 0,05 | 0,064 | 0,00 | 0,026 | 0,00 | 0,047 | 0,01 | 0,000 | 0,914 | 0,890 |
| 2-Undecanol                                              | 0,136  | 0,03 | 0,084  | 0,01 | 0,114  | 0,01 | 0,041 | 0,00 | 0,010 | 0,00 | 0,028 | 0,00 | 0,000 | 0,016 | 0,579 |
| 3-Hexenol                                                | 0,001  | 0,00 | 0,000  | 0,00 | 0,000  | 0,00 | 0,053 | 0,01 | 0,024 | 0,00 | 0,056 | 0,01 | 0,000 | 0,013 | 0,013 |
| Benzyl alcohol                                           | 0,000  | 0,00 | 0,116  | 0,03 | 0,151  | 0,02 | 0,003 | 0,00 | 0,024 | 0,01 | 0,025 | 0,01 | 0,000 | 0,000 | 0,002 |
| Decanol                                                  | 0,056  | 0,02 | 0,061  | 0,01 | 0,066  | 0,01 | 0,016 | 0,00 | 0,009 | 0,00 | 0,016 | 0,00 | 0,000 | 0,538 | 0,566 |
| Hexanol                                                  | 0,000  | 0,00 | 0,949  | 0,28 | 1,329  | 0,22 | 0,007 | 0,01 | 0,085 | 0,00 | 0,191 | 0,02 | 0,000 | 0,001 | 0,004 |
| Heptanol                                                 | 0,063  | 0,01 | 0,013  | 0,00 | 0,117  | 0,03 | 0,009 | 0,00 | 0,010 | 0,00 | 0,017 | 0,00 | 0,001 | 0,004 | 0,007 |
| Isoamyl alcohol                                          | 11,848 | 0,16 | 12,643 | 2,32 | 11,064 | 0,86 | 1,526 | 0,10 | 1,039 | 0,04 | 2,012 | 0,21 | 0,000 | 0,916 | 0,282 |
| Isobutyl alcohol                                         | 0,379  | 0,06 | 0,567  | 0,02 | 0,477  | 0,16 | 0,095 | 0,01 | 0,052 | 0,03 | 0,133 | 0,00 | 0,000 | 0,350 | 0,143 |
| Octanol                                                  | 0,255  | 0,03 | 0,252  | 0,05 | 0,251  | 0,04 | 0,035 | 0,00 | 0,026 | 0,00 | 0,045 | 0,01 | 0,000 | 0,914 | 0,890 |
| Phenylethyl alcohol                                      | 11,484 | 1,37 | 10,156 | 2,41 | 11,452 | 2,06 | 1,068 | 0,07 | 0,730 | 0,04 | 1,270 | 0,12 | 0,000 | 0,621 | 0,877 |
| Sulcatol                                                 | 0,000  | 0,00 | 0,019  | 0,00 | 0,014  | 0,00 | 0,002 | 0,00 | 0,000 | 0,00 | 0,001 | 0,00 | 0,000 | 0,002 | 0,001 |
| <b>Terpenes, terpene derivatives and nor-isoprenoids</b> | 3,946  | 0,35 | 3,173  | 0,64 | 3,516  | 0,47 | 0,523 | 0,02 | 0,252 | 0,02 | 0,553 | 0,02 | 0,000 | 0,195 | 0,575 |
| $\alpha$ -Caryophyllene                                  | 0,193  | 0,03 | 0,146  | 0,02 | 0,506  | 0,03 | 0,058 | 0,00 | 0,024 | 0,00 | 0,112 | 0,00 | 0,000 | 0,000 | 0,000 |

|                            |        |      |        |      |        |      |       |      |       |      |       |      |       |       |       |
|----------------------------|--------|------|--------|------|--------|------|-------|------|-------|------|-------|------|-------|-------|-------|
| $\alpha$ -Farnesene (E, E) | 0,061  | 0,01 | 0,426  | 0,09 | 0,594  | 0,06 | 0,004 | 0,00 | 0,022 | 0,01 | 0,078 | 0,00 | 0,000 | 0,000 | 0,001 |
| Cis-geraniol               | 0,000  | 0,00 | 0,000  | 0,00 | 0,021  | 0,00 | 0,003 | 0,00 | 0,002 | 0,00 | 0,004 | 0,00 | 0,000 | 0,000 | 0,000 |
| Citronellol                | 0,076  | 0,01 | 0,139  | 0,02 | 0,129  | 0,01 | 0,025 | 0,00 | 0,010 | 0,00 | 0,024 | 0,00 | 0,000 | 0,026 | 0,006 |
| Dihydroterpineol           | 0,000  | 0,00 | 0,110  | 0,02 | 0,066  | 0,02 | 0,002 | 0,00 | 0,001 | 0,00 | 0,004 | 0,00 | 0,000 | 0,000 | 0,000 |
| Eugenol                    | 0,000  | 0,00 | 0,000  | 0,00 | 0,000  | 0,00 | 0,009 | 0,01 | 0,002 | 0,00 | 0,004 | 0,00 | 0,038 | 0,358 | 0,349 |
| Geranyl acetone            | 0,000  | 0,00 | 0,018  | 0,00 | 0,019  | 0,00 | 0,004 | 0,01 | 0,004 | 0,00 | 0,008 | 0,00 | 0,006 | 0,004 | 0,011 |
| Linalool                   | 2,660  | 0,32 | 2,011  | 0,44 | 1,872  | 0,36 | 0,292 | 0,01 | 0,160 | 0,01 | 0,265 | 0,02 | 0,000 | 0,123 | 0,197 |
| Methyl geranate            | 0,093  | 0,01 | 0,041  | 0,00 | 0,043  | 0,01 | 0,063 | 0,00 | 0,018 | 0,01 | 0,007 | 0,00 | 0,000 | 0,000 | 0,337 |
| Myrcene                    | 0,862  | 0,03 | 0,181  | 0,04 | 0,178  | 0,00 | 0,043 | 0,01 | 0,000 | 0,00 | 0,033 | 0,00 | 0,000 | 0,000 | 0,000 |
| trans-Geraniol             | 0,000  | 0,00 | 0,102  | 0,01 | 0,088  | 0,00 | 0,019 | 0,00 | 0,009 | 0,00 | 0,014 | 0,00 | 0,000 | 0,000 | 0,000 |
| <b>Esters</b>              | 80,934 | 5,53 | 42,887 | 6,54 | 38,535 | 5,16 | 6,528 | 0,04 | 3,584 | 0,04 | 6,981 | 0,73 | 0     | 0,001 | 0,001 |
| 2-Methylbutyl isobutyrate  | 1,456  | 0,08 | 0,846  | 0,31 | 0,749  | 0,09 | 0,178 | 0,03 | 0,032 | 0,00 | 0,090 | 0,01 | 0,000 | 0,010 | 0,040 |
| Butyl acetate              | 0,000  | 0,00 | 0,004  | 0,00 | 0,001  | 0,00 | 0,002 | 0,00 | 0,000 | 0,00 | 0,003 | 0,00 | 0,533 | 0,039 | 0,000 |
| Butyl caproate             | 0,000  | 0,00 | 0,000  | 0,00 | 0,083  | 0,02 | 0,000 | 0,00 | 0,000 | 0,00 | 0,000 | 0,00 | 0,000 | 0,000 | 0,000 |
| Ethyl acetate              | 2,874  | 0,09 | 2,941  | 0,50 | 2,504  | 0,50 | 0,236 | 0,01 | 0,158 | 0,01 | 0,286 | 0,03 | 0,000 | 0,695 | 0,419 |
| Ethyl butyrate             | 0,332  | 0,05 | 0,344  | 0,05 | 0,359  | 0,07 | 0,040 | 0,01 | 0,039 | 0,02 | 0,078 | 0,02 | 0,000 | 0,546 | 0,923 |
| Ethyl caproate             | 4,490  | 0,13 | 7,516  | 1,93 | 5,815  | 0,10 | 0,634 | 0,02 | 0,453 | 0,02 | 0,950 | 0,11 | 0,000 | 0,110 | 0,070 |
| Ethyl decanoate            | 21,871 | 3,07 | 2,985  | 0,55 | 5,076  | 1,30 | 1,202 | 0,07 | 0,317 | 0,01 | 0,766 | 0,08 | 0,000 | 0,000 | 0,000 |
| Ethyl heptanoate           | 0,048  | 0,01 | 0,286  | 0,05 | 0,250  | 0,04 | 0,012 | 0,00 | 0,005 | 0,00 | 0,011 | 0,00 | 0,000 | 0,002 | 0,002 |
| Ethyl laurate              | 3,752  | 0,65 | 0,382  | 0,07 | 0,462  | 0,10 | 0,102 | 0,03 | 0,056 | 0,00 | 0,091 | 0,02 | 0,000 | 0,000 | 0,000 |

|                      |        |      |         |       |         |       |        |      |       |      |        |      |       |       |       |
|----------------------|--------|------|---------|-------|---------|-------|--------|------|-------|------|--------|------|-------|-------|-------|
| Ethyl nonanoate      | 0,560  | 0,07 | 0,218   | 0,08  | 0,271   | 0,03  | 0,036  | 0,00 | 0,017 | 0,01 | 0,042  | 0,00 | 0,000 | 0,003 | 0,004 |
| Ethyl octanoate      | 37,024 | 2,01 | 20,107  | 3,51  | 17,590  | 2,46  | 3,231  | 0,09 | 1,987 | 0,02 | 3,629  | 0,36 | 0,000 | 0,001 | 0,001 |
| Ethyl-9-decenoate    | 0,070  | 0,01 | 1,050   | 0,18  | 0,505   | 0,04  | 0,002  | 0,00 | 0,079 | 0,01 | 0,100  | 0,02 | 0,000 | 0,000 | 0,000 |
| Hexyl acetate        | 0,173  | 0,01 | 0,288   | 0,05  | 0,295   | 0,07  | 0,018  | 0,00 | 0,021 | 0,00 | 0,042  | 0,01 | 0,000 | 0,063 | 0,138 |
| Hexyl butyrate       | 0,000  | 0,00 | 0,003   | 0,00  | 0,020   | 0,00  | 0,001  | 0,00 | 0,000 | 0,00 | 0,000  | 0,00 | 0,000 | 0,000 | 0,000 |
| Hexyl caproate       | 0,000  | 0,00 | 0,000   | 0,00  | 0,001   | 0,00  | 0,002  | 0,00 | 0,004 | 0,00 | 0,004  | 0,00 | 0,001 | 0,017 | 0,212 |
| Hexyl n-valerate     | 0,205  | 0,03 | 0,038   | 0,00  | 0,076   | 0,01  | 0,001  | 0,00 | 0,004 | 0,00 | 0,020  | 0,01 | 0,000 | 0,000 | 0,000 |
| Isoamyl acetate      | 7,557  | 0,28 | 5,270   | 0,87  | 3,927   | 0,51  | 0,730  | 0,02 | 0,382 | 0,05 | 0,807  | 0,06 | 0,000 | 0,003 | 0,003 |
| Isoamyl caproate     | 0,000  | 0,00 | 0,000   | 0,00  | 0,002   | 0,00  | 0,001  | 0,00 | 0,001 | 0,00 | 0,003  | 0,00 | 0,004 | 0,000 | 0,551 |
| Isoamyl propionate   | 0,000  | 0,00 | 0,201   | 0,04  | 0,170   | 0,03  | 0,020  | 0,01 | 0,002 | 0,00 | 0,007  | 0,00 | 0,000 | 0,001 | 0,000 |
| Isobutyl isobutyrate | 0,521  | 0,12 | 0,407   | 0,09  | 0,380   | 0,07  | 0,079  | 0,00 | 0,025 | 0,00 | 0,050  | 0,01 | 0,533 | 0,039 | 0,000 |
| <b>Other</b>         | 2,898  | 0,36 | 4,912   | 0,43  | 4,692   | 0,84  | 0,490  | 0,11 | 0,217 | 0,07 | 0,552  | 0,04 | 0,000 | 0,033 | 0,019 |
| Caprylic acid        | 2,045  | 0,28 | 4,019   | 0,58  | 4,087   | 0,79  | 0,463  | 0,11 | 0,208 | 0,07 | 0,534  | 0,04 | 0,000 | 0,026 | 0,018 |
| <b>Totale</b>        | 113,96 | 7,78 | 77,6922 | 12,25 | 74,0574 | 10,30 | 10,716 | 0,20 | 6,238 | 0,26 | 12,329 | 1,21 | 0,000 | 0,013 | 0,016 |

Two-way analysis of variance (ANOVA) ( $p \leq 0.05$ ). T0: beer before maturation; T30: beer after maturation; Beer CONTR: beer with no apple pomace addition; Beer UNST: beer added with unstarted apple pomace; Beer F: beer added with *Lactobacillus rhamnosus* 1473 fermented apple pomace.
